# Supplementary material for: Hydrazines as Substrates and Inhibitors of the Archaeal Ammonia Oxidation Pathway
Source: PubMed Central journal article supplement (PMC9040604; doi:10.1128/aem.02470-21), 2022-04-06
Supplement: aem.02470-21-s0001.pdf [file aem.02470-21-s0001.pdf]

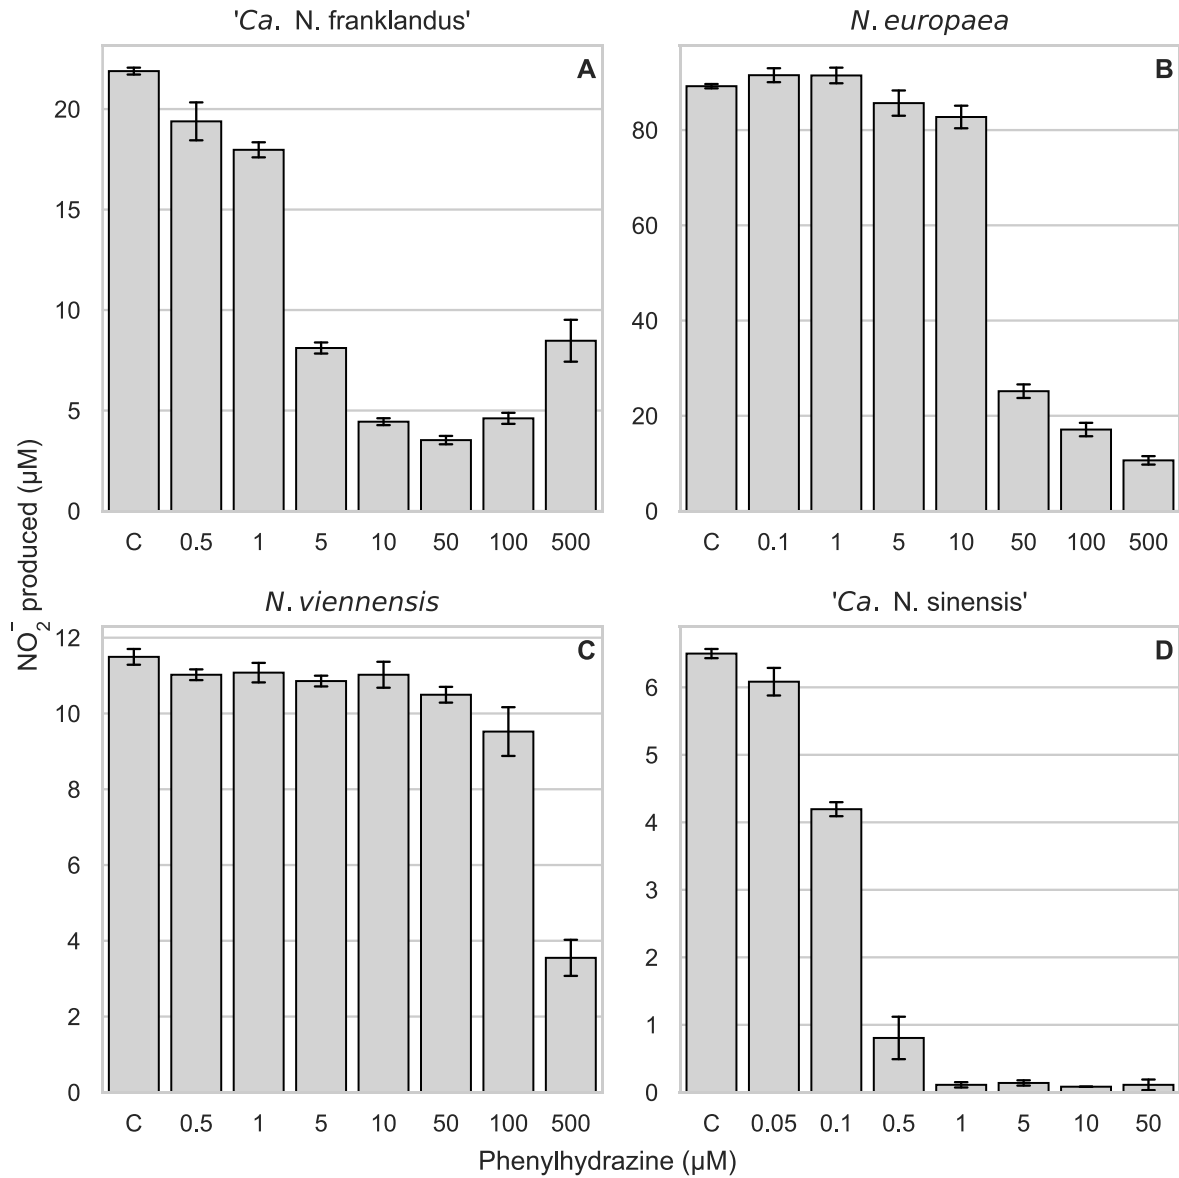

1  
2  
3  
4  
5  
6  
7

Supplemental Figure 1.  $\text{NO}_2^-$  production after 1 h incubation with different concentrations of phenylhydrazine using 100  $\mu\text{M}$   $\text{NH}_2\text{OH}$  as substrate for *N. europaea* and 'Ca. Nitrosotalea sinensis' and 200  $\mu\text{M}$  for 'Ca. Nitrosocosmicus franklandus' and *N. viennensis*.  $\text{NO}_2^-$  was measured 1 h after addition of the substrate. Error bars represent standard deviation (n = 3).

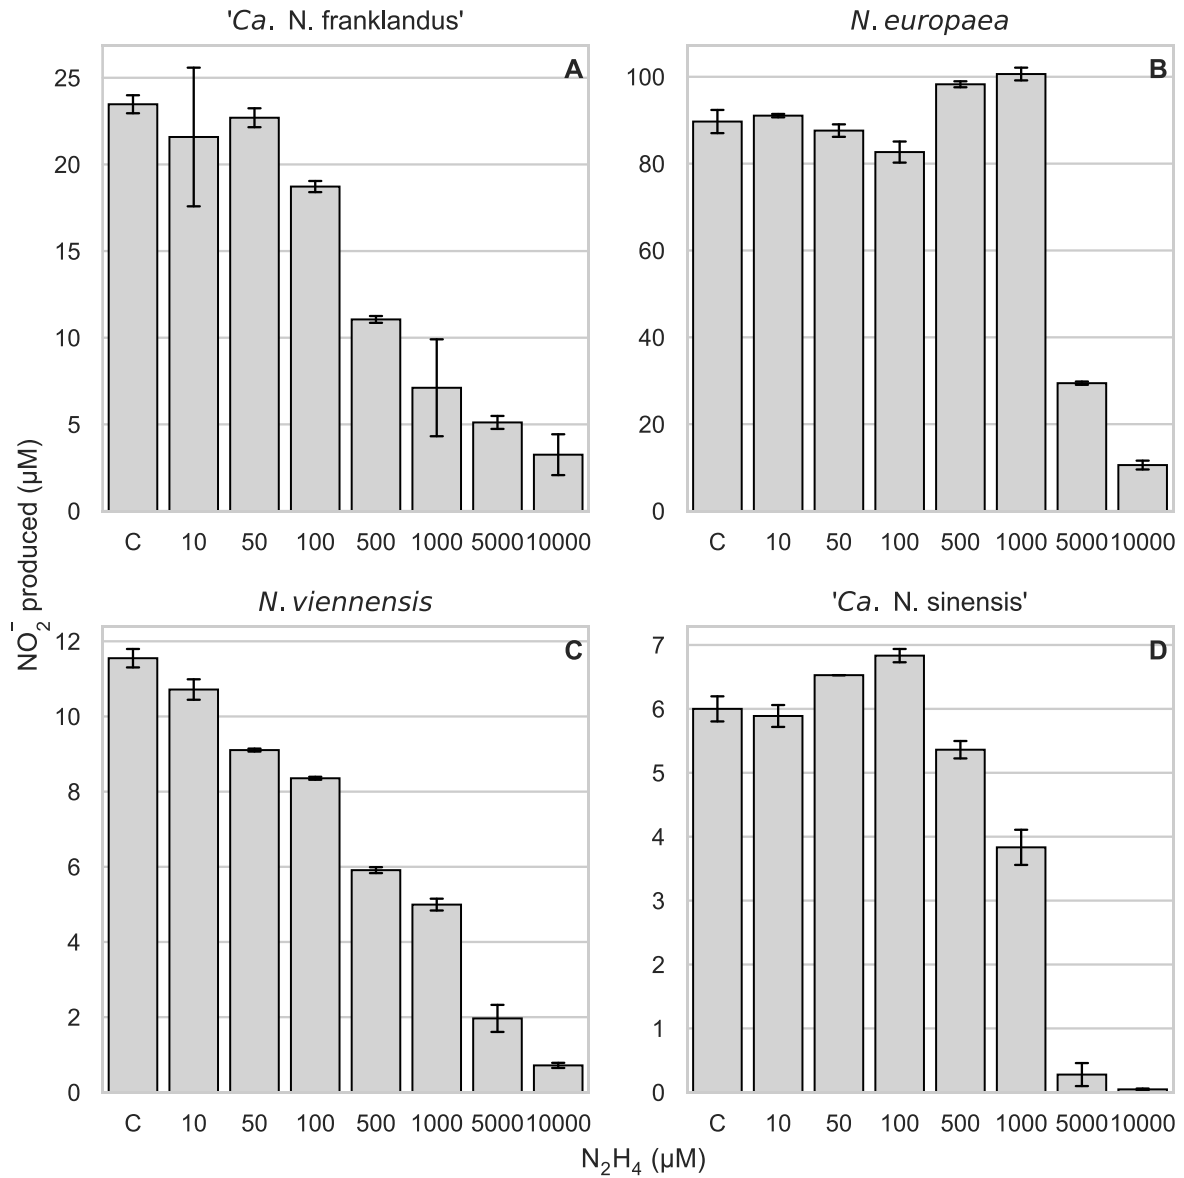

8

9

10 Supplemental Figure 2.  $\text{NO}_2^-$  production after 1 h incubation with different concentrations of  
 11  $\text{N}_2\text{H}_4$  using 100  $\mu\text{M}$   $\text{NH}_2\text{OH}$  as substrate for *N. europaea* and 'Ca. Nitrosotalea sinensis' and  
 12 200  $\mu\text{M}$  for 'Ca. Nitrosocosmicus franklandus' and *N. viennensis*.  $\text{NO}_2^-$  was measured 1 h after  
 13 addition of the substrate. Error bars represent standard deviation (n = 3).

14

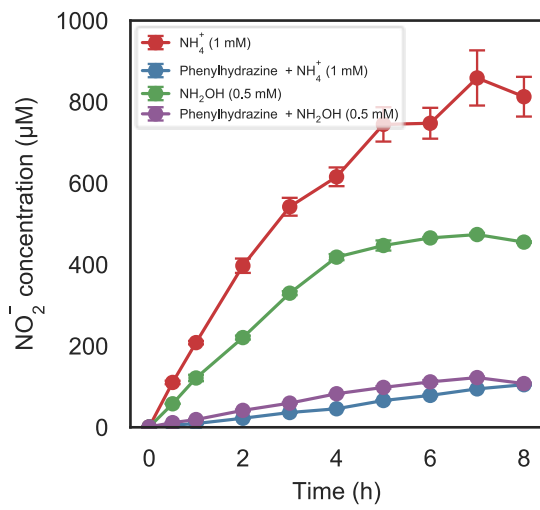

15

16

17 Supplemental Figure 3 – Time course of the recovery of NO<sub>2</sub><sup>-</sup> production in *N. europaea* with

18 1 mM NH<sub>4</sub><sup>+</sup> or 0.5 mM NH<sub>2</sub>OH as substrate after removal of 100 µM phenylhydrazine by

19 washing. Error bars represent the standard deviation (n = 3).

20

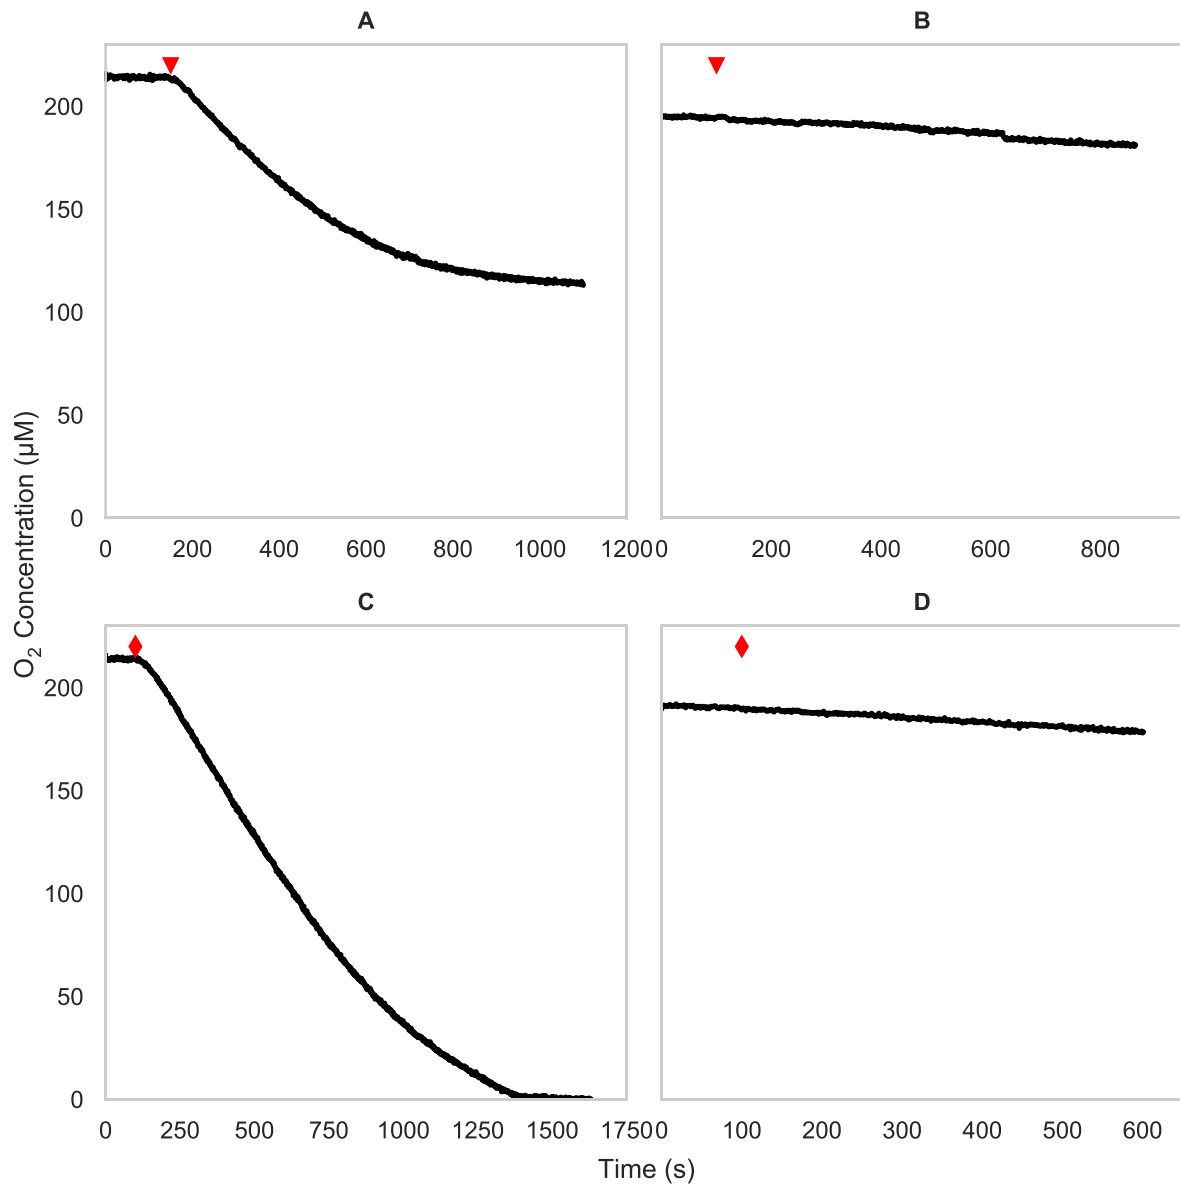

21

22

23 Supplemental Figure 4 – Oxygen uptake measurements by cell suspensions of *N. europaea*.

24 Concentrations of 100 μM NH<sub>2</sub>OH (A and B, red triangles) or 600 μM N<sub>2</sub>H<sub>4</sub> (C and D, red

25 diamonds) were added. Control cells (A and C) are compared to cells incubated with 100 μM

26 phenylhydrazine (B and D). Experiments were performed at least three times with similar

27 results.

28

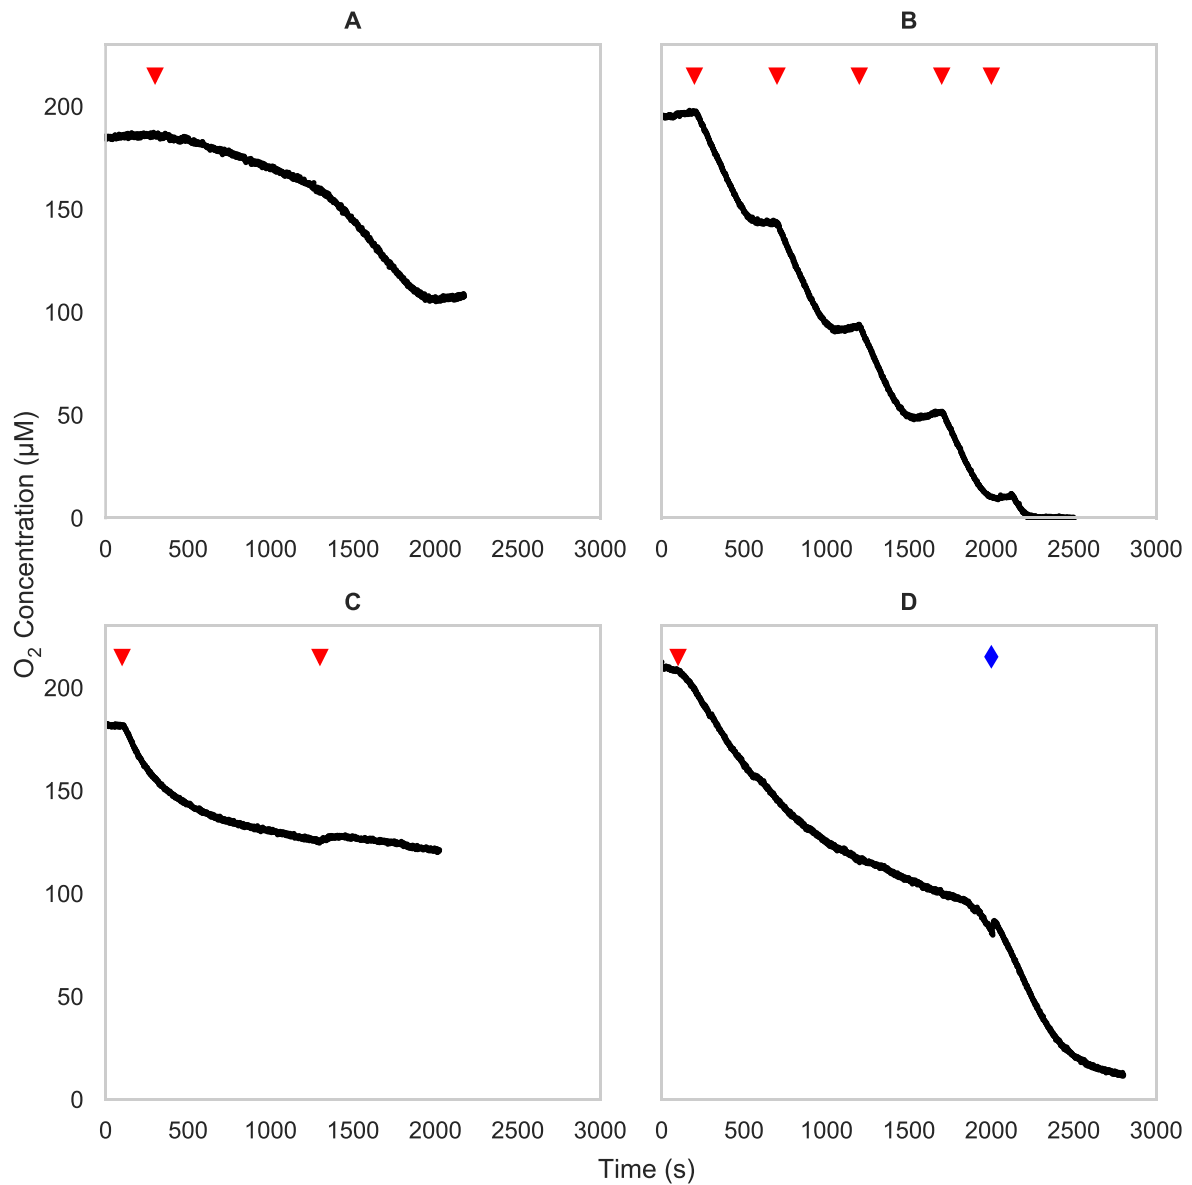

29

30

31 Supplemental Figure 5 – Oxygen uptake measurements by cell suspensions of ‘*Ca.*

32 *Nitrosocosmicus franklandus*’. A: addition of 400 µM NH<sub>2</sub>OH (red triangle); B: repeated

33 spiking with 200 µM NH<sub>2</sub>OH (red triangles) until anoxic; C: spiking with 600 µM N<sub>2</sub>H<sub>4</sub> (red

34 triangles); D: addition of 600 µM N<sub>2</sub>H<sub>4</sub> (red triangle) followed by 500 µM NH<sub>4</sub><sup>+</sup> (blue diamond).

35

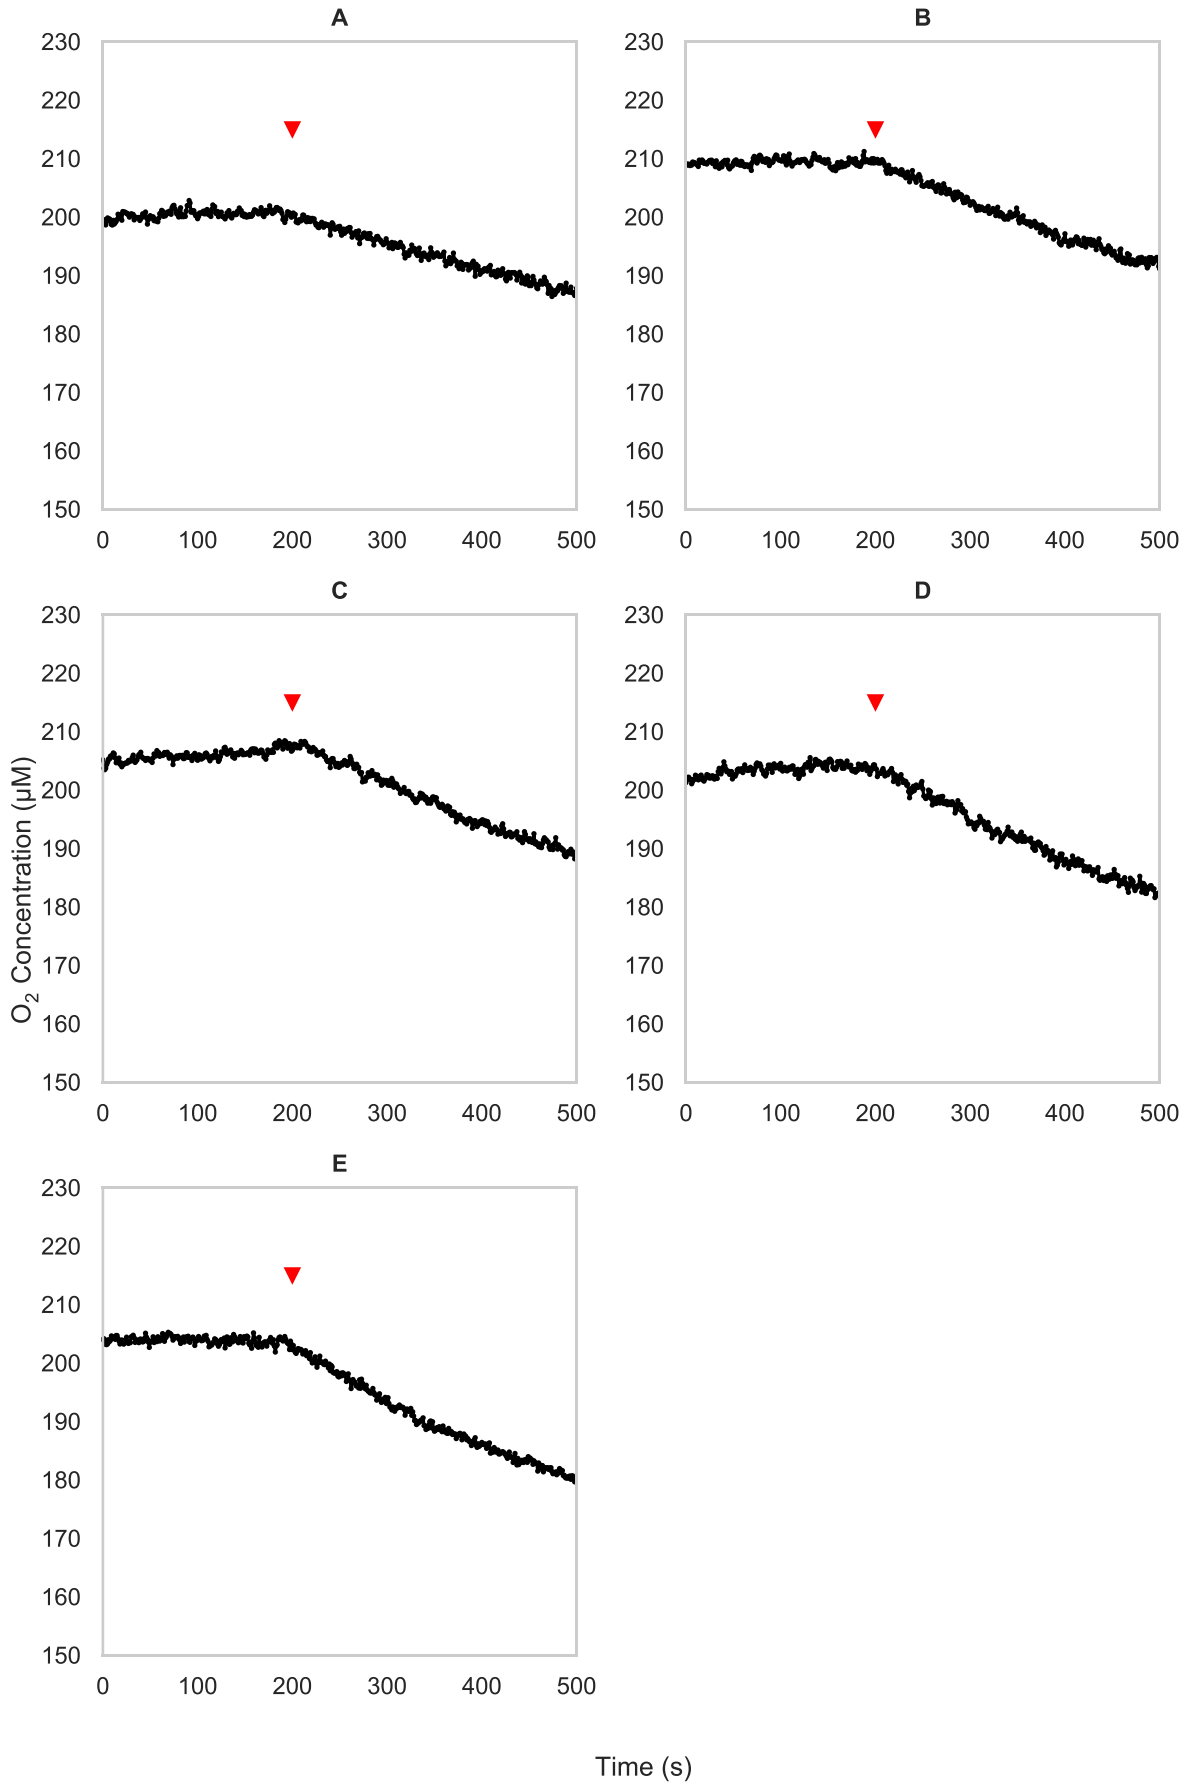

37 Supplemental Figure 6 – Initial rates of oxygen consumption in cell suspensions of '*Ca.*  
38 *Nitrosocosmicus franklandus*' after addition of different concentrations of  $N_2H_4$  (red  
39 triangles). A: 200  $\mu M$   $N_2H_4$ ; B: 400  $\mu M$   $N_2H_4$ ; C: 600  $\mu M$ ;  $N_2H_4$ ; D: 800  $\mu M$ ;  $N_2H_4$ ; E: 1000  $\mu M$   
40  $N_2H_4$ .

41

**Supplementary Table 1. Experimental design for the end-point inhibition assays**

| Organism                                      | Ammonia (μM) | Hydroxylamine (μM) | Hydrazine (μM) | Phenylhydrazine (μM) | Results shown |
|-----------------------------------------------|--------------|--------------------|----------------|----------------------|---------------|
| ' <i>Ca. Nitrosocosmicus franklandus</i> C13' | 100          | -                  | -              | 0.05-500             | Figure 1      |
|                                               | -            | 200                | -              | 0.05-500             | Figure S1     |
|                                               | 100          | -                  | 1-10,000       | -                    | Figure 2      |
|                                               | -            | 200                | 1-10,000       | -                    | Figure S2     |
| <i>Nitrosomonas europaea</i>                  | 100          | -                  | -              | 0.05-500             | Figure 1      |
|                                               | -            | 100                | -              | 0.05-500             | Figure S1     |
|                                               | 100          | -                  | 1-10,000       | -                    | Figure 2      |
|                                               | -            | 100                | 1-10,000       | -                    | Figure S2     |
| <i>Nitrososphaera viennensis</i> EN76         | 100          | -                  | -              | 0.05-500             | Figure 1      |
|                                               | -            | 200                | -              | 0.05-500             | Figure S1     |
|                                               | 100          | -                  | 1-10,000       | -                    | Figure 2      |
|                                               | -            | 200                | 1-10,000       | -                    | Figure S2     |
| ' <i>Ca. Nitrosotalea sinensis</i> Nd2'       | 100          | -                  | -              | 0.05-500             | Figure 1      |
|                                               | -            | 100                | -              | 0.05-500             | Figure S1     |
|                                               | 100          | -                  | 1-10,000       | -                    | Figure 2      |
|                                               | -            | 100                | 1-10,000       | -                    | Figure S2     |



| Supplementary Table 2. Experimental design for the oxygen uptake experiments |                              |                                    |                                |                                      |               |
|------------------------------------------------------------------------------|------------------------------|------------------------------------|--------------------------------|--------------------------------------|---------------|
| Organism                                                                     | Ammonia<br>( $\mu\text{M}$ ) | Hydroxylamine<br>( $\mu\text{M}$ ) | Hydrazine<br>( $\mu\text{M}$ ) | Phenylhydrazine<br>( $\mu\text{M}$ ) | Results shown |
| <i>'Ca. Nitrosocosmicus franklandus C13'</i>                                 | -                            | 200                                | -                              | -                                    | Figure 4A     |
|                                                                              | -                            | 200                                | -                              | 100                                  | Figure 4B     |
|                                                                              | -                            | -                                  | 600                            | -                                    | Figure 4C     |
|                                                                              | -                            | -                                  | 600                            | 100                                  | Figure 4D     |
|                                                                              | -                            | 400                                | -                              | -                                    | Figure S5A    |
|                                                                              | -                            | 5 x 200                            | -                              | -                                    | Figure S5B    |
|                                                                              | -                            | -                                  | 2 x 600                        | -                                    | Figure S5C    |
|                                                                              | 500                          | -                                  | 600                            | -                                    | Figure S5D    |
|                                                                              | -                            | -                                  | 200-1,000                      | -                                    | Figure S6     |
| <i>Nitrosomonas europaea</i>                                                 | -                            | 100                                | -                              | -                                    | Figure S4A    |
|                                                                              | -                            | 100                                | -                              | 100                                  | Figure S4B    |
|                                                                              | -                            | -                                  | 600                            | -                                    | Figure S4C    |
|                                                                              | -                            | -                                  | 600                            | 100                                  | Figure S4D    |
